# Supplementary material
Source: Springer Nature journal article supplement (https://www.springermedizin.de/resource/supplementary/12890_2012_352_MOESM1_ESM.pdf/9504982)

# Collapsed nasal bridge and cochlear implants in a patient with Wegeners granulomatosis

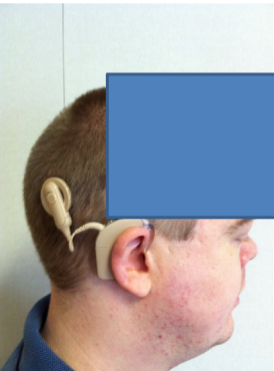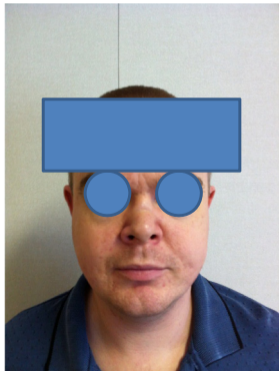

Supplement: MOESM1 [file 9504982]
